# Supplementary material for: The characteristics of early-stage research into human genes are substantially different from subsequent research
Source: PubMed Central journal article supplement (PMC8769369; doi:10.1371/journal.pbio.3001520), 2022-01-06

Figure S3

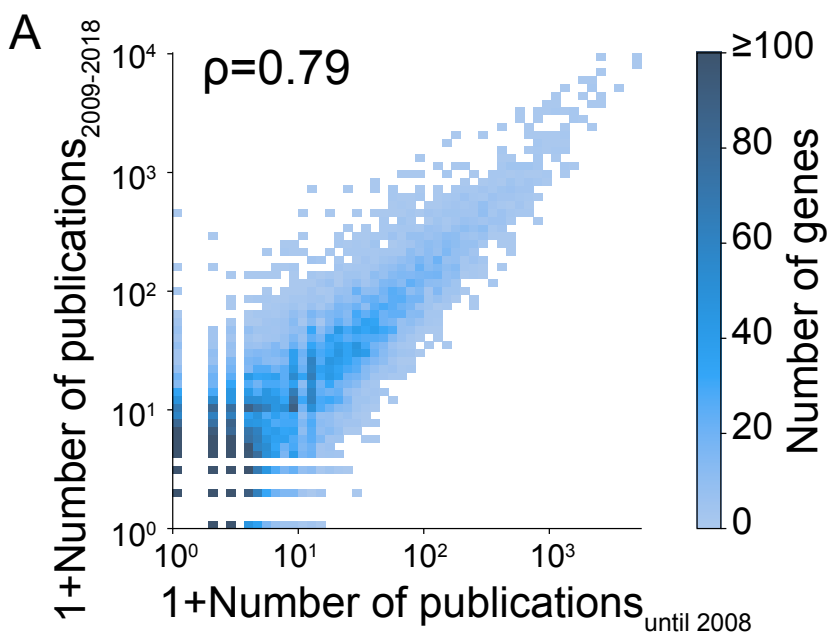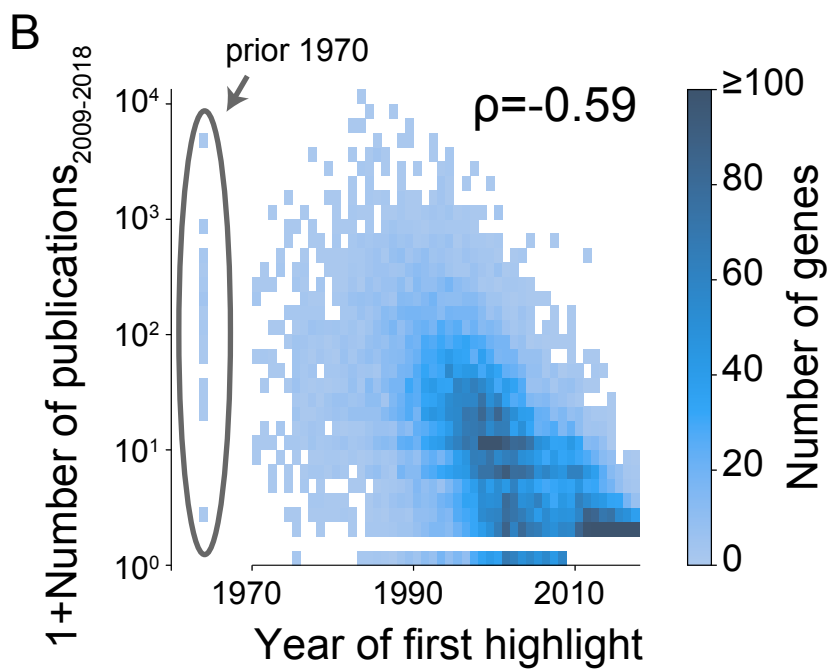

Supplement: pbio.3001520.s004.pdf [file pbio.3001520.s004.pdf]
