# Supplementary material for: The characteristics of early-stage research into human genes are substantially different from subsequent research
Source: PubMed Central journal article supplement (PMC8769369; doi:10.1371/journal.pbio.3001520), 2022-01-06
Supplement: pbio.3001520.s008.pdf [file pbio.3001520.s008.pdf]

Figure S7

1980-1989

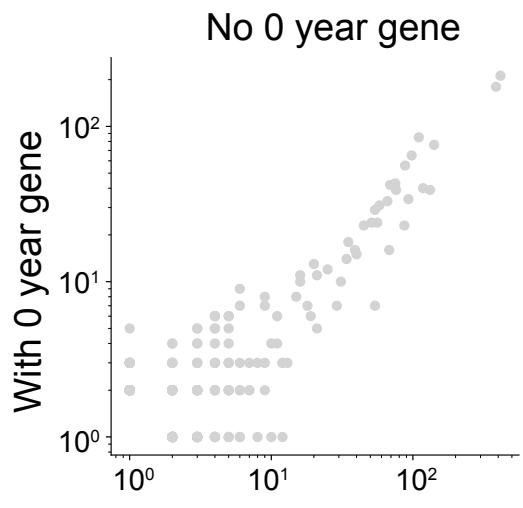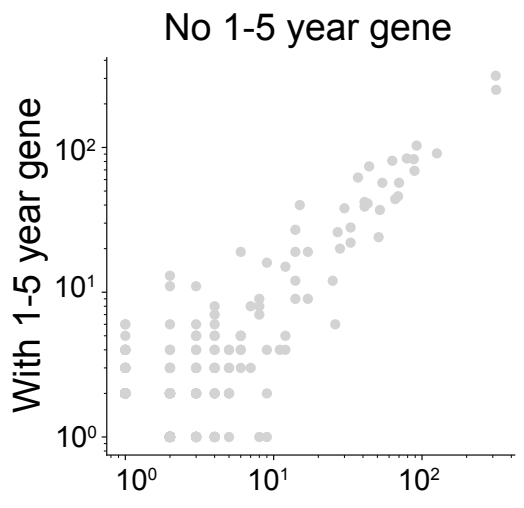

1990-1999

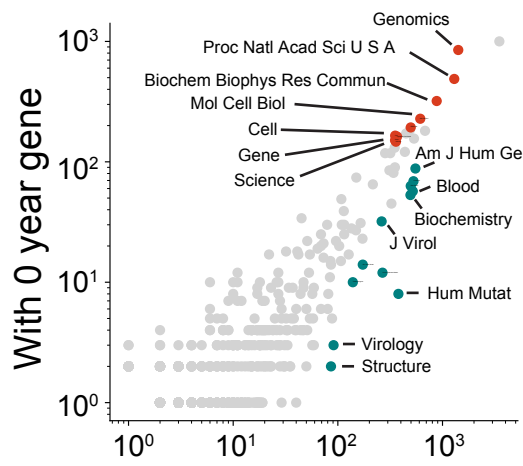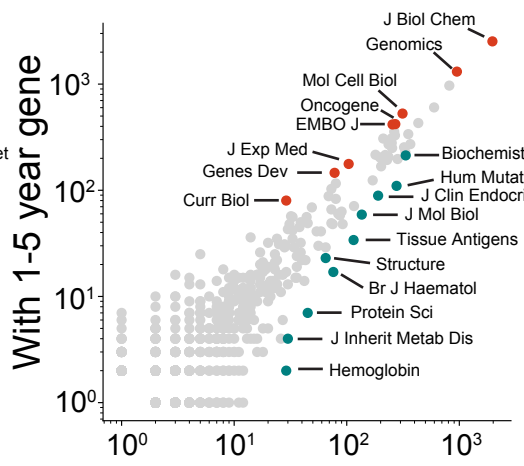

2000-2009

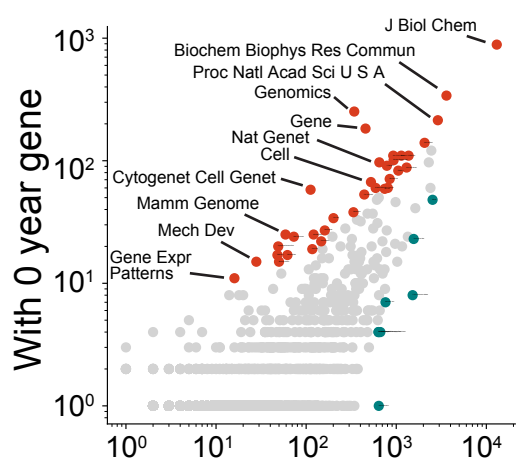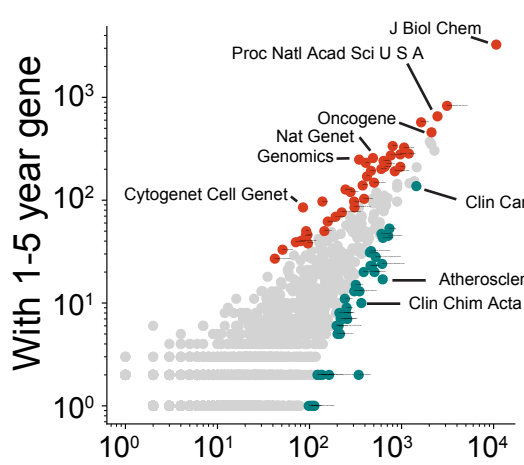

2010-2018

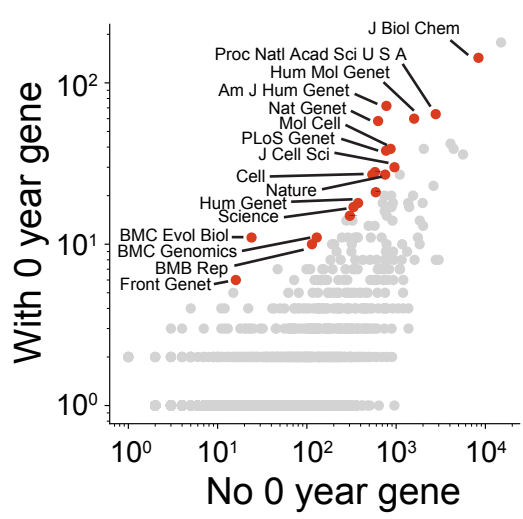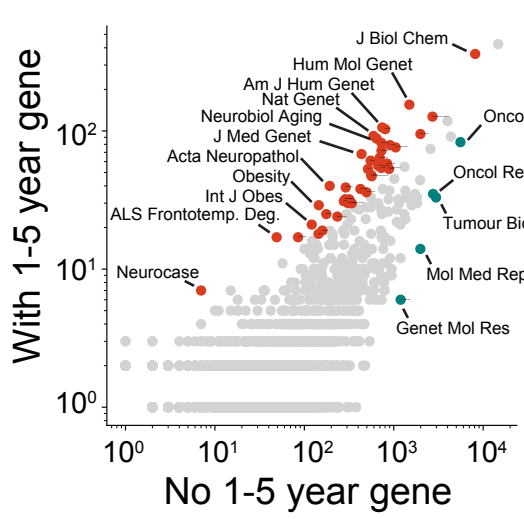

No 0 year gene

No 1-5 year gene
